# Supplementary material for: Microglia contribute to methamphetamine reinforcement and reflect persistent transcriptional and morphological adaptations to the drug
Source: PubMed Central journal article supplement — bioRxiv. 2024 Feb 17:2023.10.19.563168. Originally published 2023 Oct 23. Preprint. [Version 2] doi: 10.1101/2023.10.19.563168 (PMC10634674; doi:10.1101/2023.10.19.563168), 2024-02-17
Supplement: NIHPP2023.10.19.563168V1-supplement-1.pdf [file NIHPP2023.10.19.563168V1-supplement-1.pdf]

766 **Supplementary Methods and Results**

767

768 **RNA-sequencing analysis of isolated striatal microglia.**

769 Biological replicates determined to be outliers were removed for differential gene expression analysis  
770 (**Supplementary Fig. 1A**). Principal component analysis (PCA) (**Supplementary Fig. 1B**) and heatmap of  
771 hierarchical clustering of conditions based on gene expression (**Supplementary Fig. 1C**) shows high  
772 similarity of samples within condition, and that animals exposed to methamphetamine (Maintenance and  
773 Abstinence) cluster more closely than to Saline.

774

775 **Microglia are not required for natural food reinforcement.**

776 To test if microglia are necessary for learned operant behavior, we food-trained mice up to FR5 for 8  
777 consecutive days (**Supplementary Fig. 2**). Mice were treated with PLX5622 (1200 ppm in AIN-76A chow)  
778 for the duration of the experiment. Microglial ablation does not affect natural food reinforcement in number  
779 of rewards earned (**Supplementary Fig. 2A**) (Two-way RM ANOVA; AIN-76A vs PLX5622,  $F(1, 13) =$   
780  $0.07321$ ,  $p=0.7910$ ) or lever discrimination (**Supplementary Fig. 2B**) (Two-way RM ANOVA; Active vs  
781 Inactive Lever,  $F(3, 26) = 24.38$ ,  $p<0.0001$ ) and time to acquire operant lever pressing behavior  
782 (**Supplementary Fig. 2B**) (Two-way RM ANOVA; AIN-76A vs PLX5622,  $F(1, 13) = 0.3855$ ,  $p=0.5454$ ).

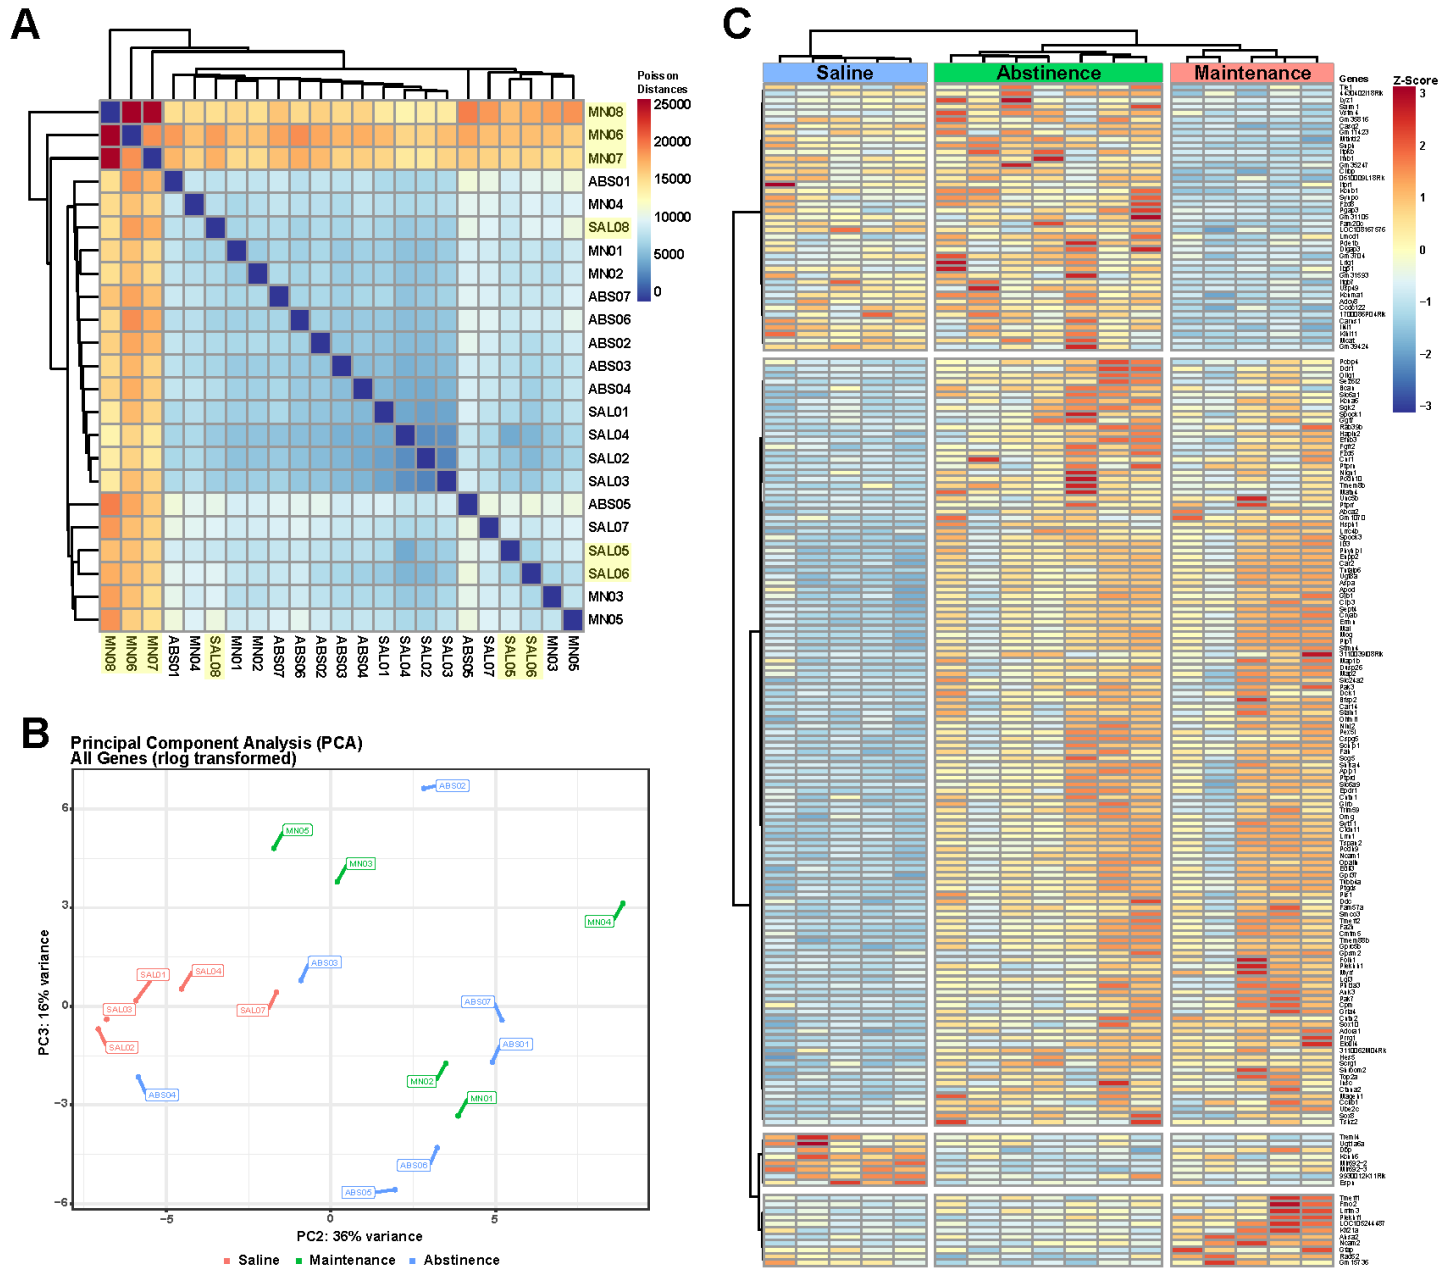

783  
784

785 **Supplementary Figure 1. RNA-sequencing of isolated striatal microglia from METH IVSA. A)**  
 786 Hierarchical clustering heatmap of expression profiles for samples (n=23) based on Poisson distance.  
 787 Highlighted samples were determined to be outliers and were removed from analyses. **B)** PCA plot for  
 788 samples (n=17) following removal of outliers. **C)** Heatmap showing unsupervised clustering of samples based  
 789 on gene expression.

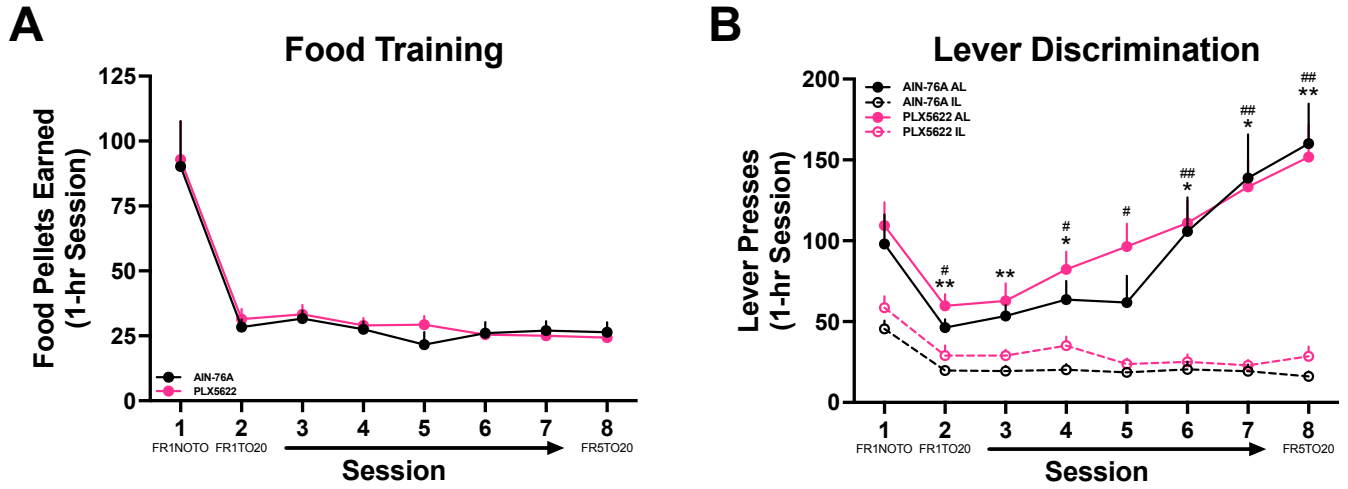

790

791 **Supplementary Figure 2. Pharmacological ablation of microglia does not affect operant responding.**

792 **A)** Number of food rewards earned during 8 daily 1-hr sessions. **(B)** Active vs inactive lever presses during  
793 8 daily 1-hr sessions (Two-way RM ANOVA with Bonferroni post-hoc test; AIN-76A Active vs Inactive Lever,  
794 \* $p < 0.05$ , \*\* $p < 0.01$ ; PLX5622 Active vs Inactive Lever, #  $p < 0.05$ , ##  $p < 0.01$ ). AIN-76A ( $n=8$ ), PLX5622  
795 ( $n=7$ ). Data are represented as mean  $\pm$  SEM.

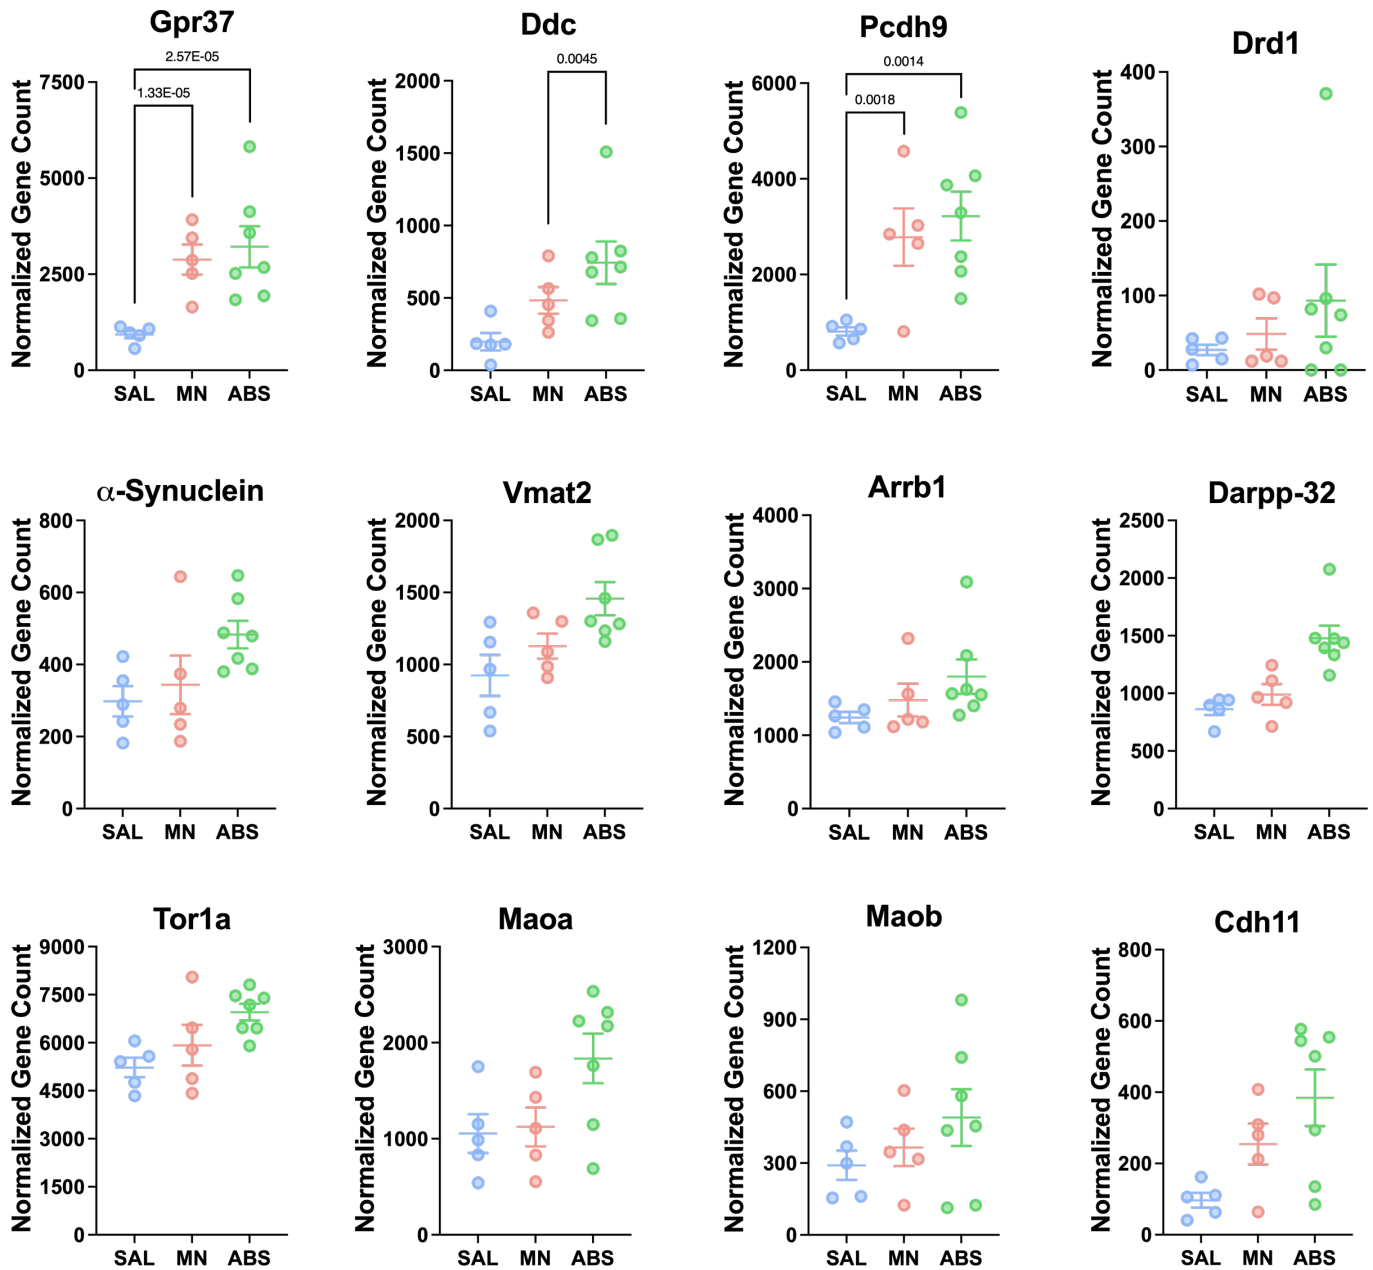

796

797

798

**Supplementary Figure 3. Dopamine signaling-related genes.** Normalized counts of DE genes with adjusted p-value for each comparison.

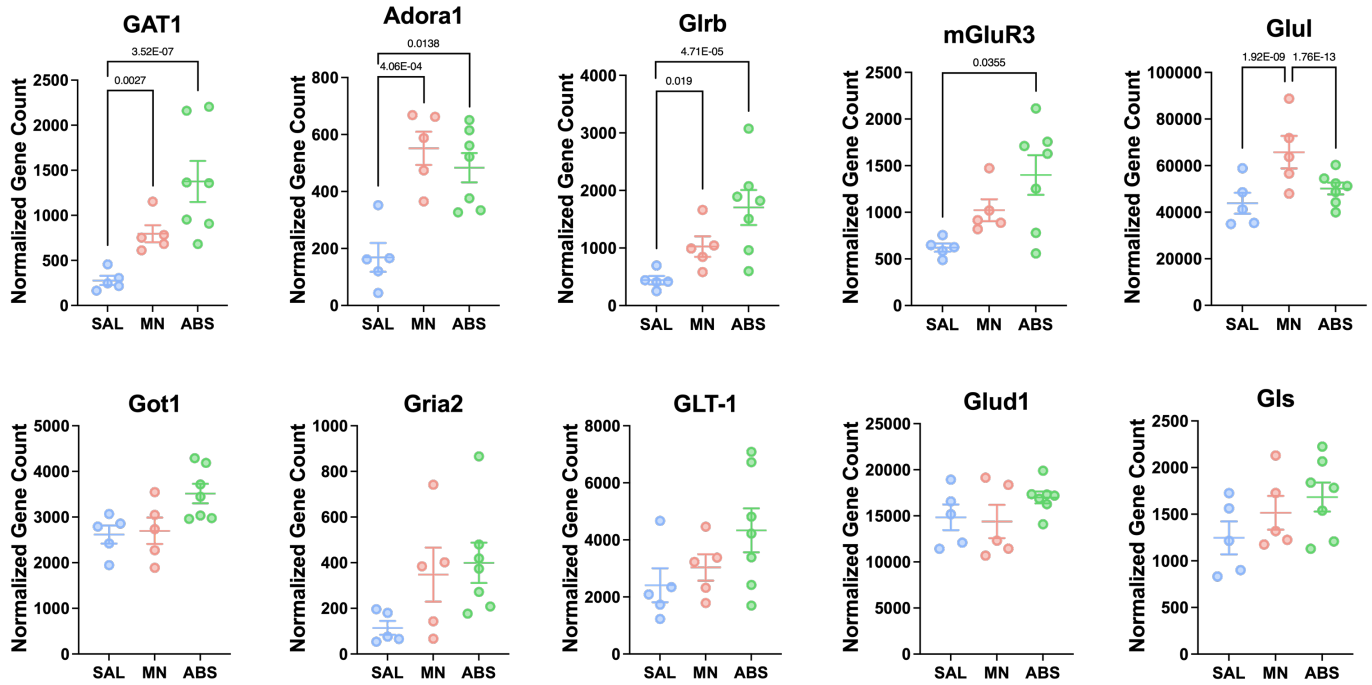

799

800

**Supplementary Figure 4. GABA, glutamate and adenosine signaling-related genes.** Normalized counts

801

of DE genes related to GABA, glutamate, and adenosine signaling with adjusted p-value for each

802

comparison.
